# Supplementary material for: Implementing the iCORAL (version 1.0) coral reef CaCO 3 production module in the iLOVECLIM climate model
Source: Copernicus journal article supplement (doi:10.5194/gmd-17-6513-2024), 2024-09-02
Supplement: Supplementary file 1 [file gmd-17-6513-2024-supplement.pdf]

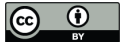

*Supplement of*

## **Implementing the iCORAL (version 1.0) coral reef CaCO<sub>3</sub> production module in the iLOVECLIM climate model**

**Nathaelle Bouttes et al.**

*Correspondence to:* Nathaelle Bouttes ([nathaelle.bouttes@lscce.ipsl.fr](mailto:nathaelle.bouttes@lscce.ipsl.fr))

The copyright of individual parts of the supplement might differ from the article licence.

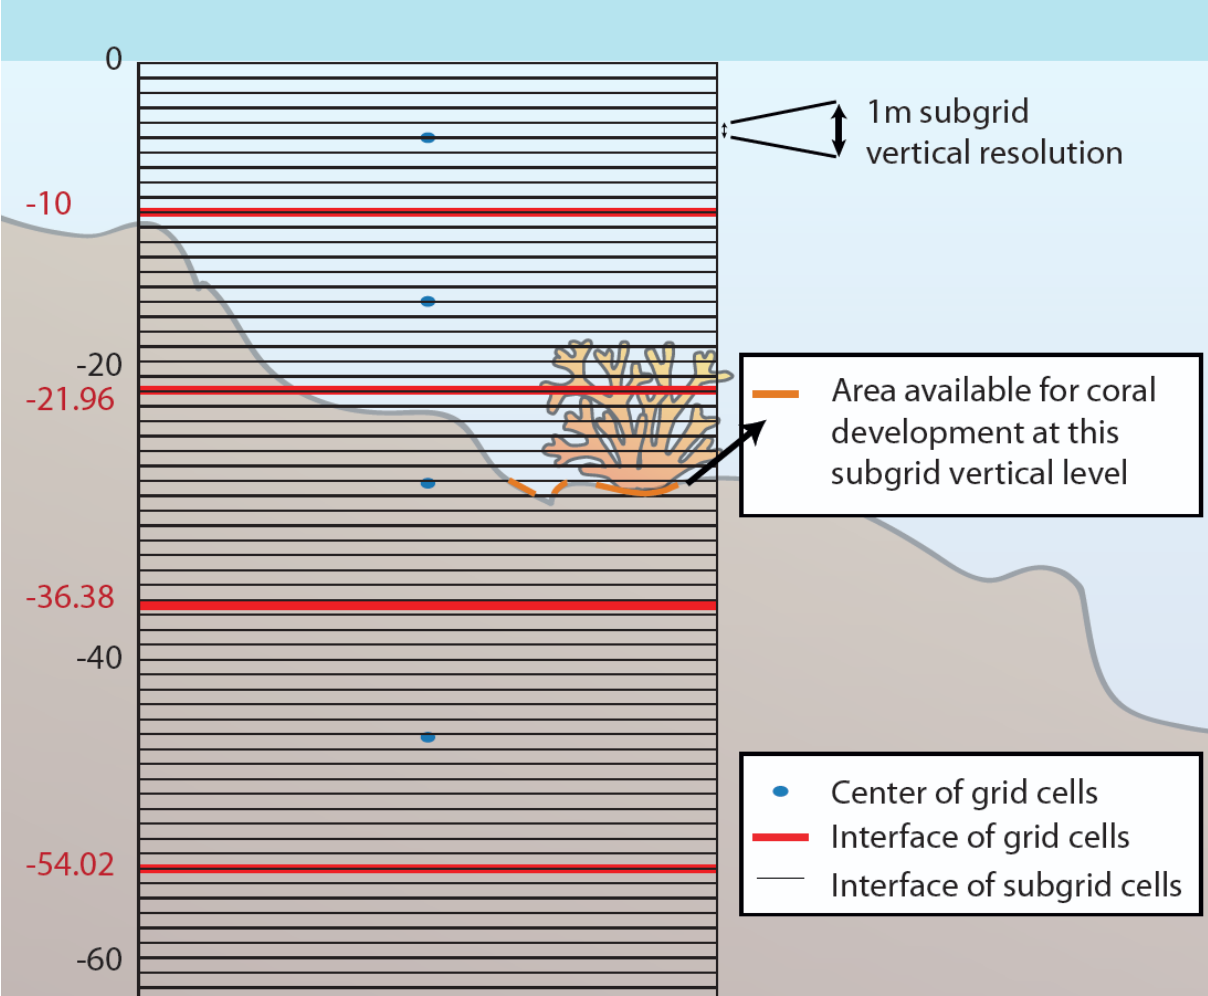

Figure S1. Schematic of the model vertical grid (m) with centre in blue dots and interface in red lines, and the 1m vertical subgrid (black lines) used for computing coral reef development.
